# Supplementary material for: Impact of calcium, zinc or aluminum dimethylphosphate coordination polymers on flame retardancy and rheological properties of poly(butylene succinate)
Source: Royal Society of Chemistry journal article supplement (doi:10.1039/d5ra06774j), 2026-01-01
Supplement: d5ra06774j1.pdf [file d5ra06774j1.pdf]

## Electronic Supplementary Information for

### Impact of calcium, zinc or aluminum dimethylphosphate coordination polymers on flame retardancy and rheological properties of poly(butylene succinate)

Mateusz Kullas<sup>a\*</sup>, Maciej Dębowski<sup>b</sup>, Paweł Groch<sup>a</sup>, Anna Czajka-Warowna<sup>c</sup> and Krystyna Czaja<sup>a</sup>

<sup>a</sup>*Institute of Chemistry, Opole University, Oleska 48, 45-052 Opole, Poland*

<sup>b</sup>*Faculty of Chemistry, Warsaw University of Technology, Noakowskiego 3, 00-664 Warsaw, Poland*

<sup>c</sup>*Faculty of Materials Science and Engineering, Warsaw University of Technology, Wołoska 141, 02-507 Warsaw, Poland*

\*Corresponding author. E-mail address: [mateusz.kullas@gmail.com](mailto:mateusz.kullas@gmail.com)

**Table S1.** Thermogravimetric data of PBS and PBS/20%MtDOPs composites derived from TGA–FTIR tests carried out in nitrogen

| Sample       | Number of degradation steps <sup>a</sup> | $T_{\max}^b$ (°C) | $T_{98\%}^c$ (°C) | $T_{95\%}^c$ (°C) | $T_{90\%}^c$ (°C) | $T_{50\%}^c$ (°C) | $T_{\text{end}}^d$ (°C) |
|--------------|------------------------------------------|-------------------|-------------------|-------------------|-------------------|-------------------|-------------------------|
| PBS          | 1                                        | 424.59            | 369.02            | 386.87            | 397.34            | 420.90            | 457.34                  |
| PBS/20%CaDMP | multi                                    | 408.34            | 315.92            | 328.44            | 368.81            | 396.43            | 416.16                  |
| PBS/20%ZnDMP | 2                                        | 419.35            | 320.04            | 354.51            | 381.14            | 413.79            | 435.59                  |
| PBS/20%AlDMP | 2                                        | 383.14            | 340.20            | 351.00            | 362.12            | 381.29            | 394.67                  |

<sup>a</sup> Refers to the number of steps in which thermal decomposition proceeded. <sup>b</sup> Temperature at the maximum decomposition rate. <sup>c</sup>  $T_x$  denotes the temperature, at which the sample mass reached x% of its initial value. <sup>d</sup>  $T_{\text{end}}$  denotes the temperature, at which the sample mass stabilized after thermal degradation.

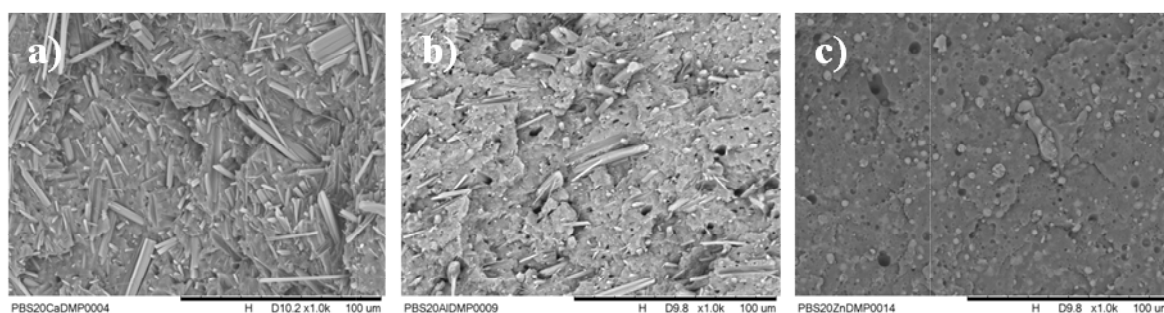

**Fig. S1.** SEM images of the cross-sections of the PBS composites filled with 20 wt.% of: a) CaDMP, b) AlDMP, c) ZnDMP obtained by means of injection moulding method. All images recorded at magnification of 1000×

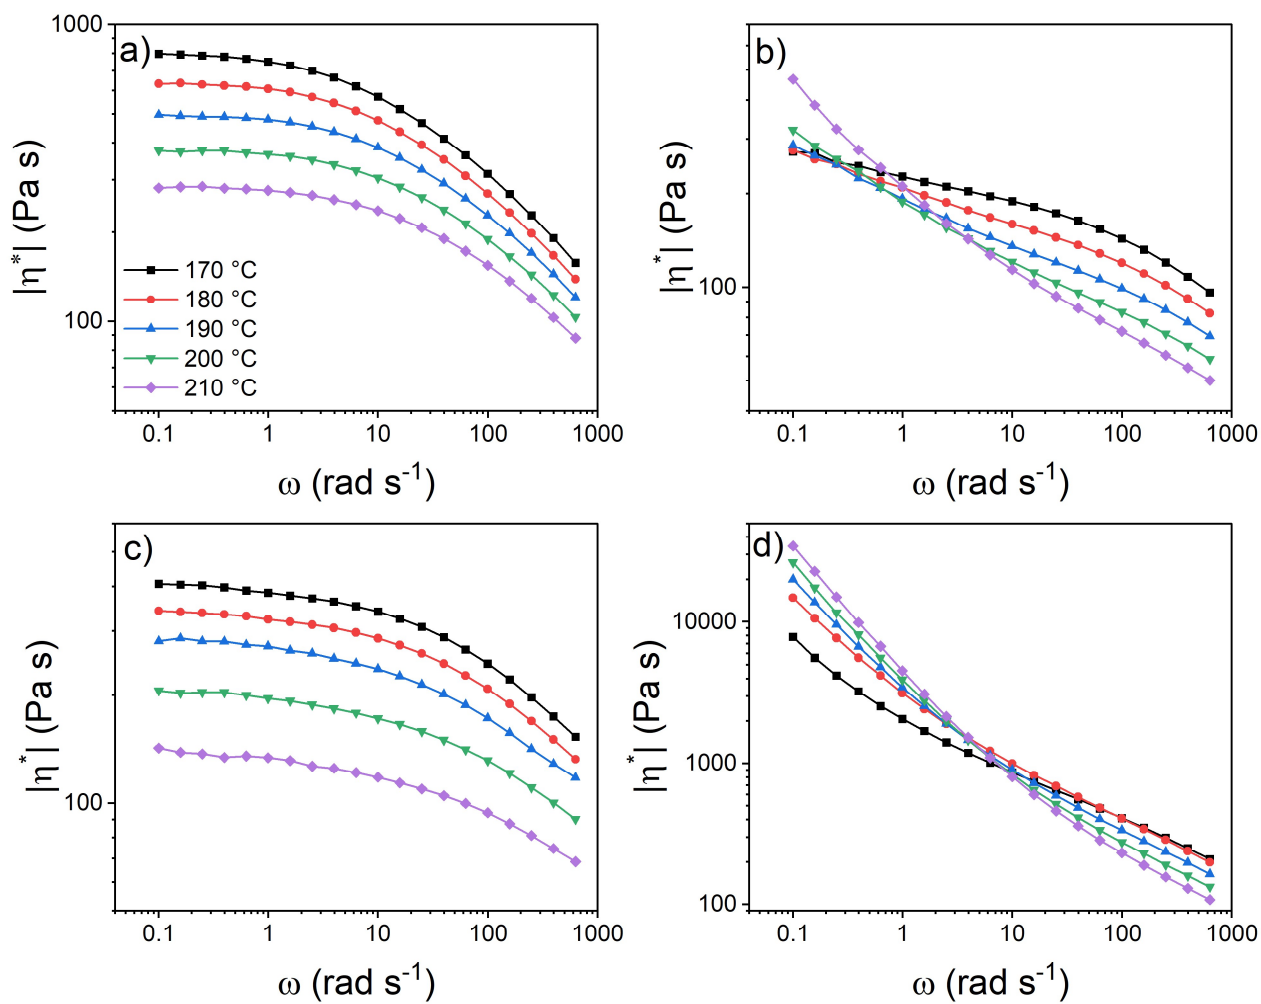

**Fig. S2.** Angular frequency dependence of complex viscosity recorded at different temperatures for: a) PBS, b) PBS/20%CaDMP, c) PBS/20%ZnDMP, and d) PBS/20%AlDMP

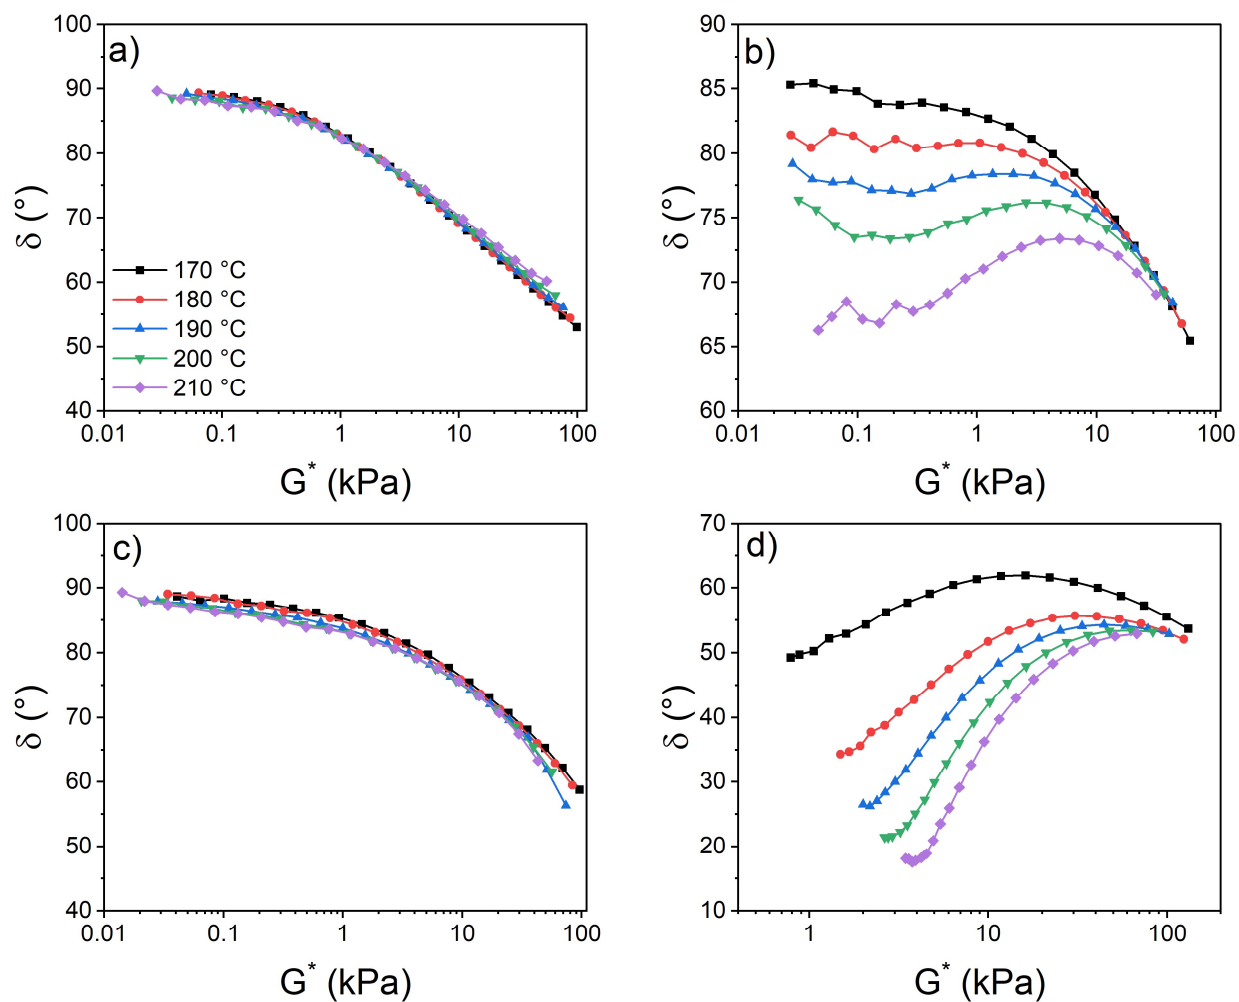

**Fig. S3.** Van Gurp–Palmen plots for: a) PBS, b) PBS/20%CaDMP, c) PBS/20%ZnDMP, and d) PBS/20%AIDMP

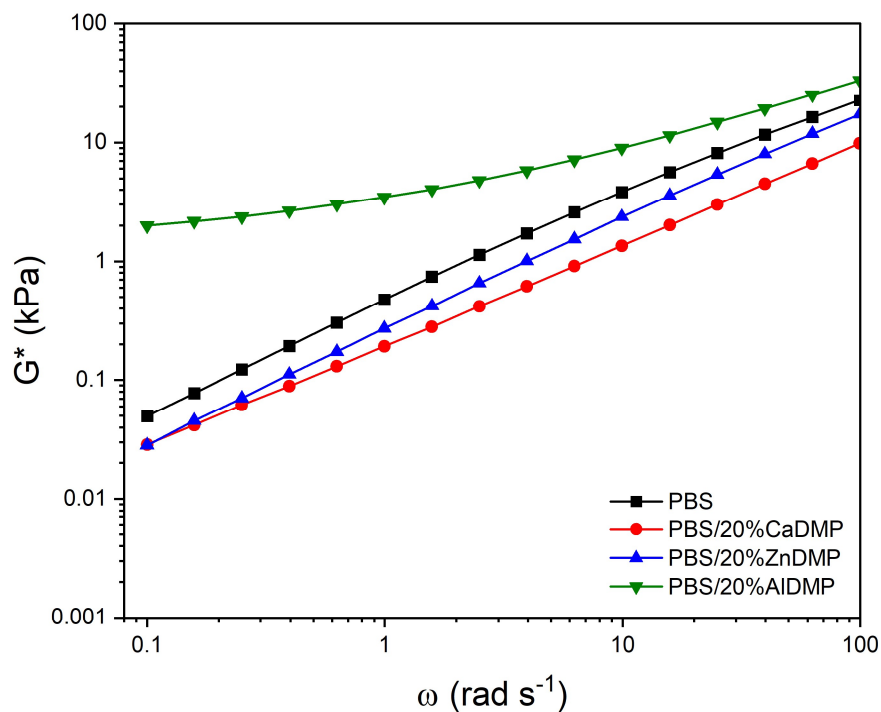

**Fig. S4.** Complex modulus variation in the low angular frequency region recorded at 190 °C

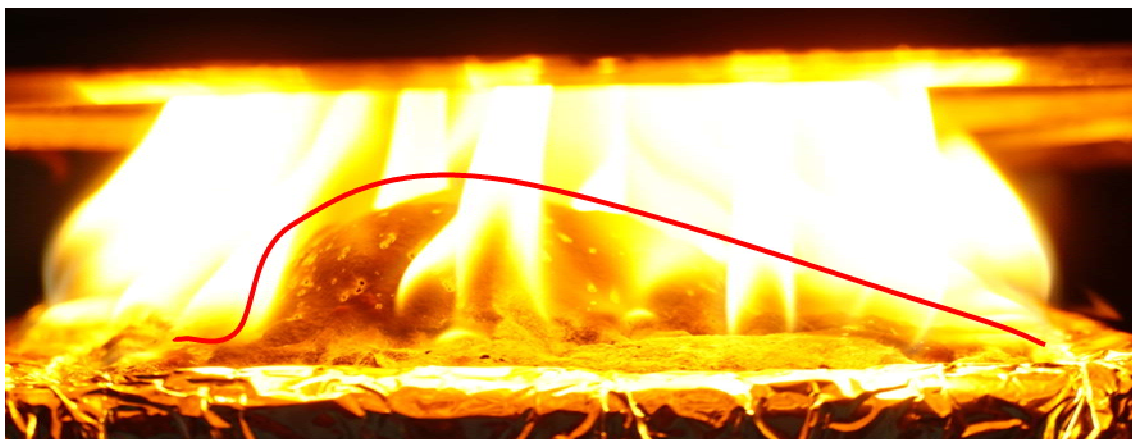

**Fig. S5.** Digital image of PBS/20%ZnDMP during burning in the MLC test

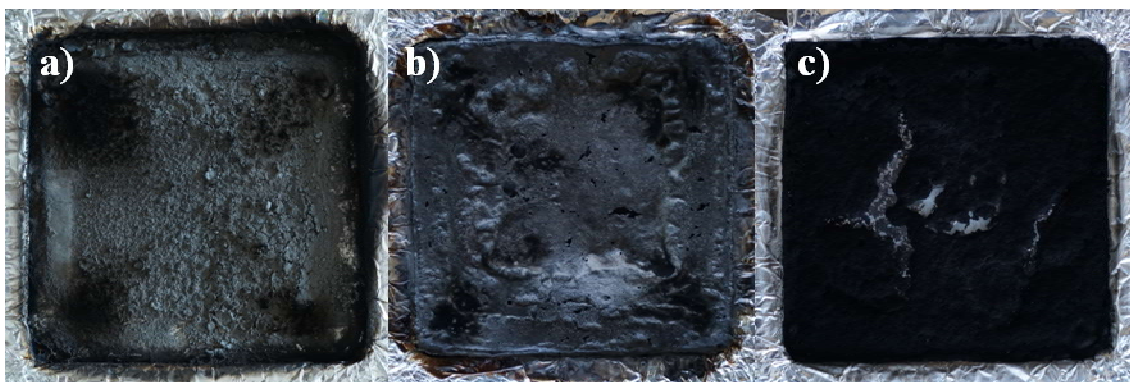

**Fig. S6.** Digital images of the surface of char residues obtained after the MLC tests for 20 wt.% composites of PBS with:  
a) CaDMP, b) ZnDMP, c) AIDMP

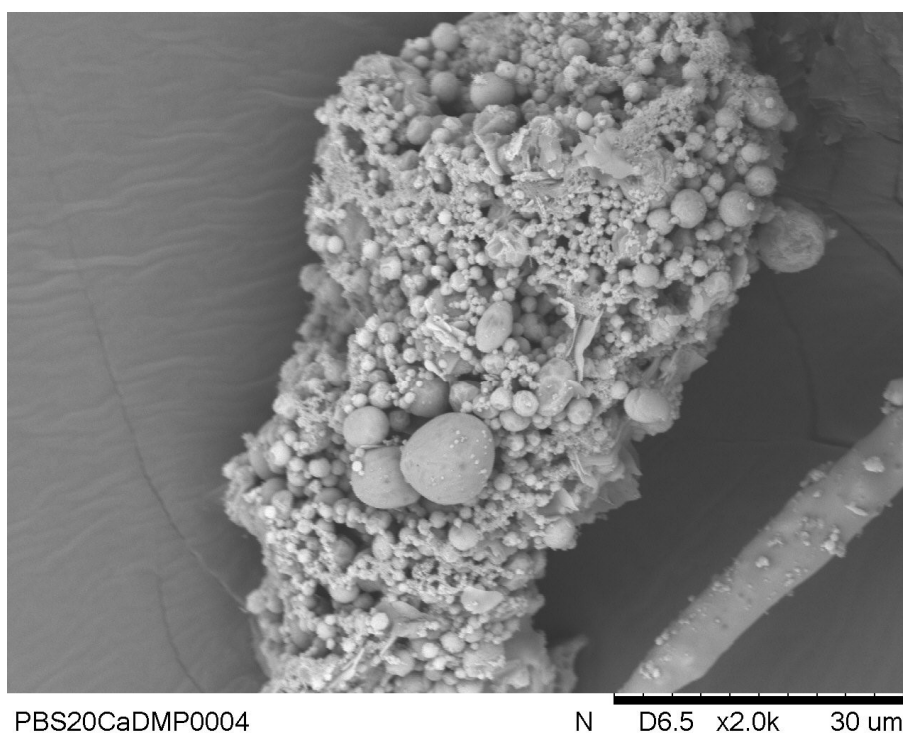

**Fig. S7.** SEM image of the internal structure of the solid residue obtained following the MLC test carried out for PBS/20%CaDMP.  
The image recorded at a magnification of 2000×



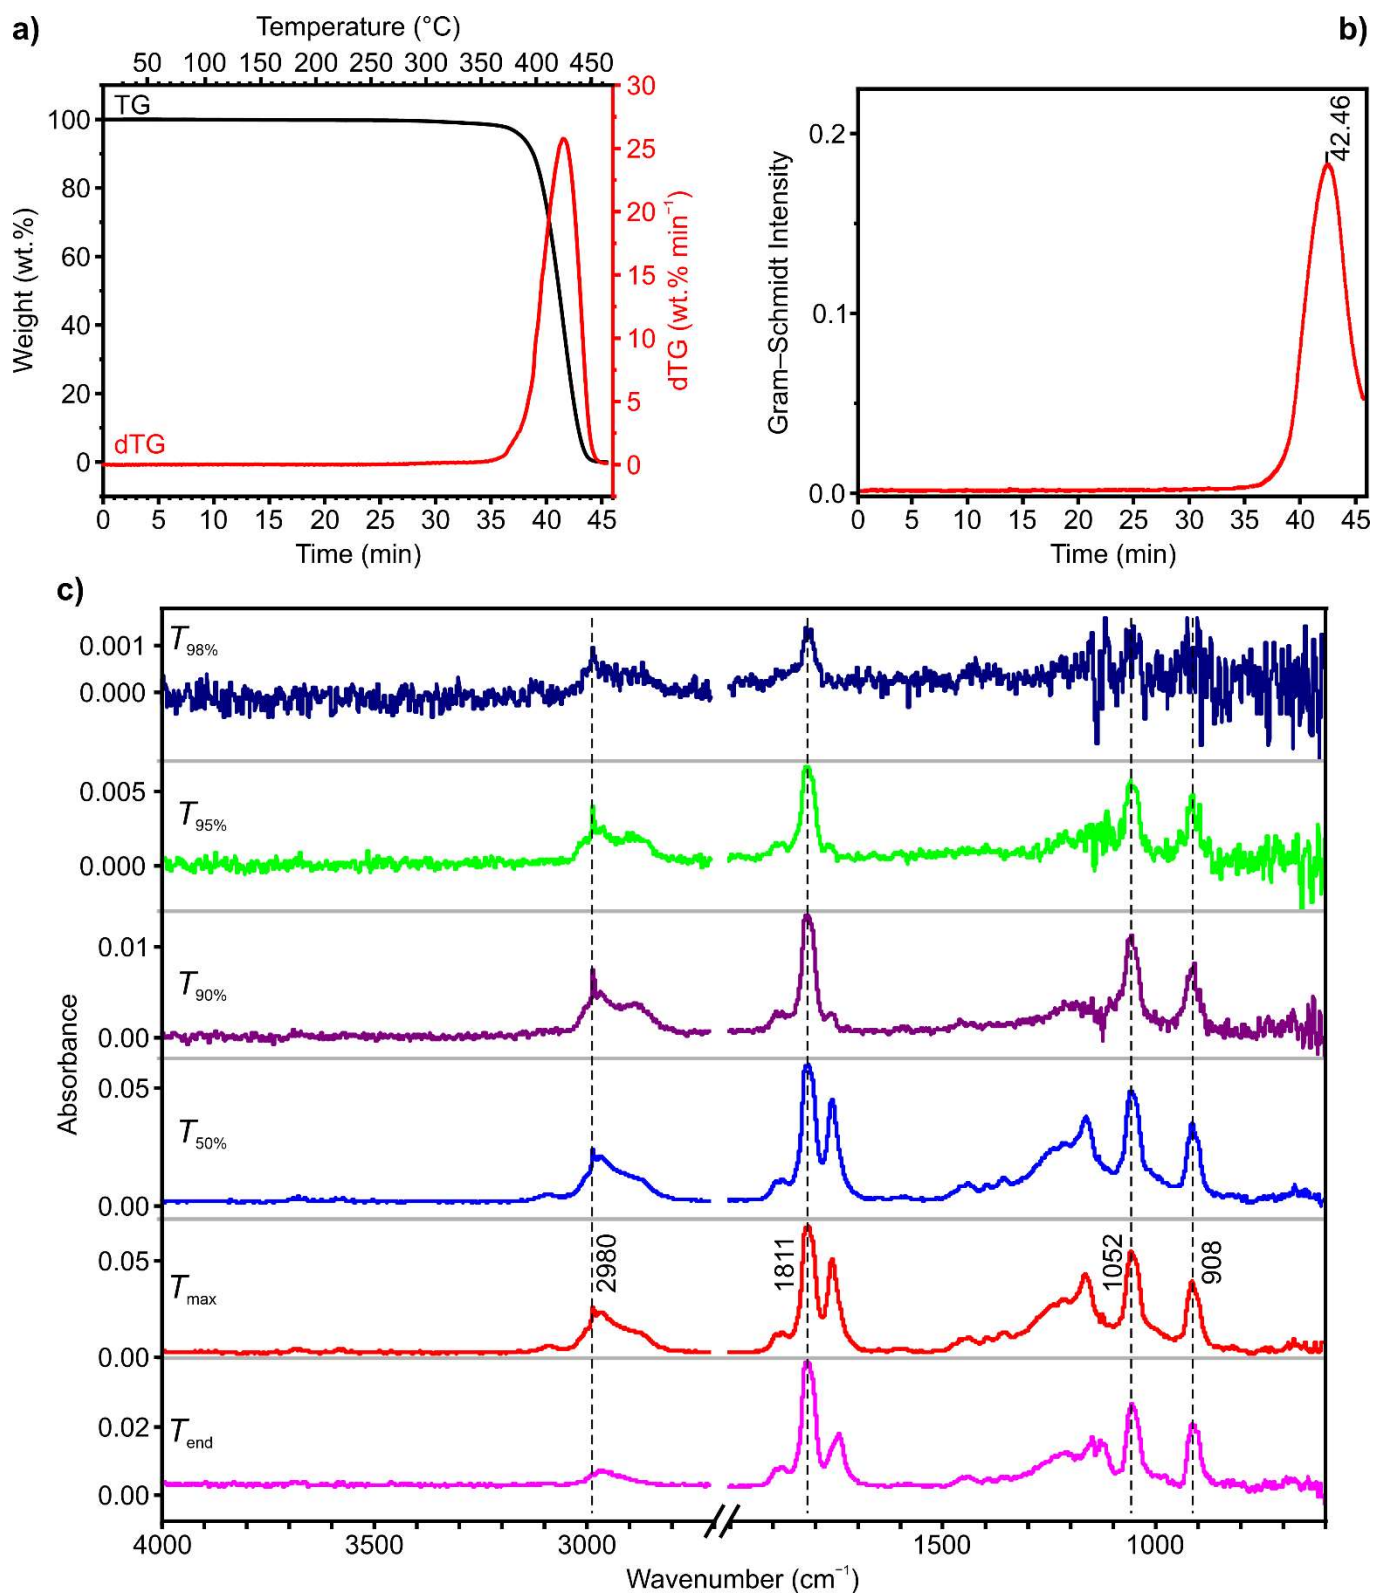

**Fig. S8.** TGA-FTIR analysis of PBS under nitrogen: a) mass loss (TG) and 1<sup>st</sup> derivative mass loss (dTG) curves, b) Gram-Schmidt curve, c) FTIR gas-phase spectra recorded at points associated with PBS characteristic temperatures as described in Table S1

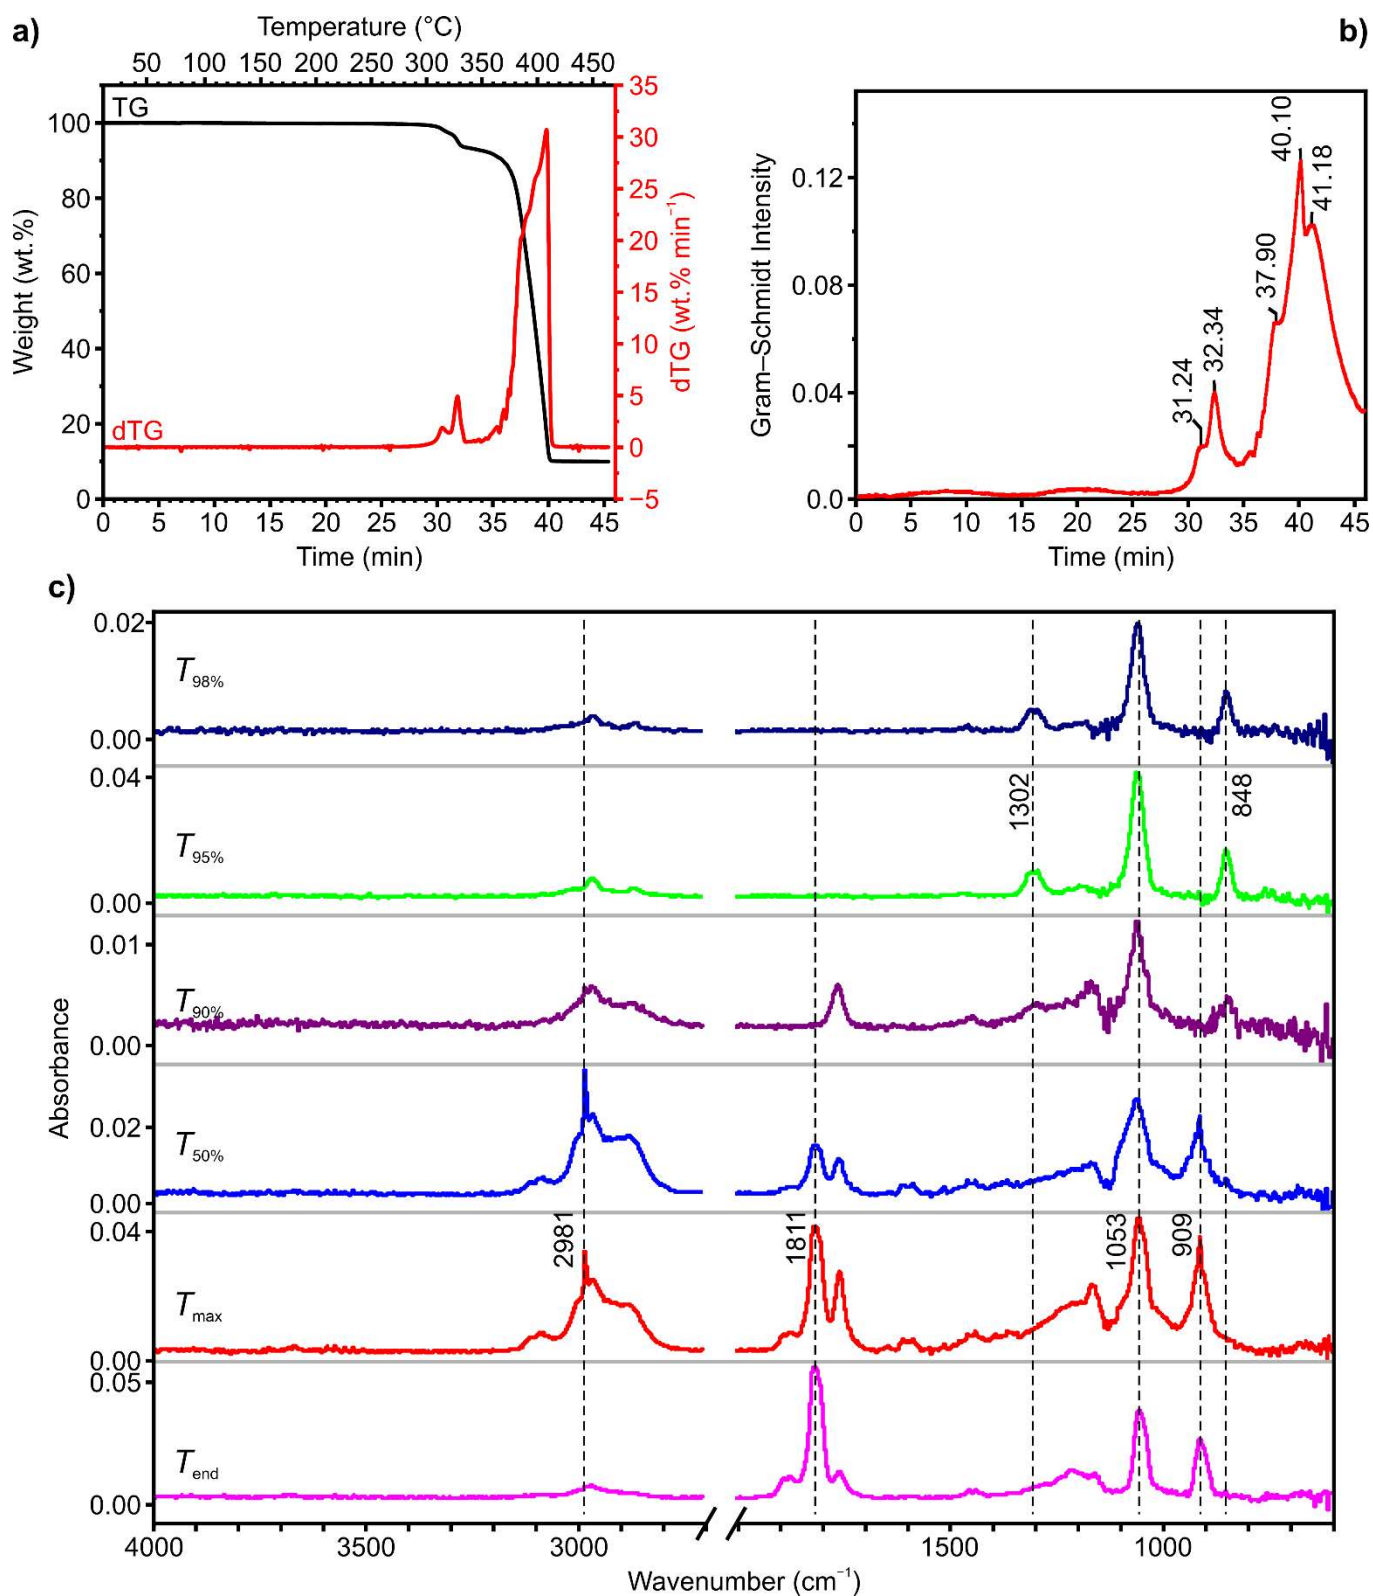

**Fig. S9.** TGA–FTIR analysis of PBS/20%CaDMP under nitrogen: a) mass loss (TG) and 1<sup>st</sup> derivative mass loss (dTG) curves, b) Gram-Schmidt curve, c) FTIR gas-phase spectra recorded at points associated with PBS/20%CaDMP characteristic temperatures as described in Table S1

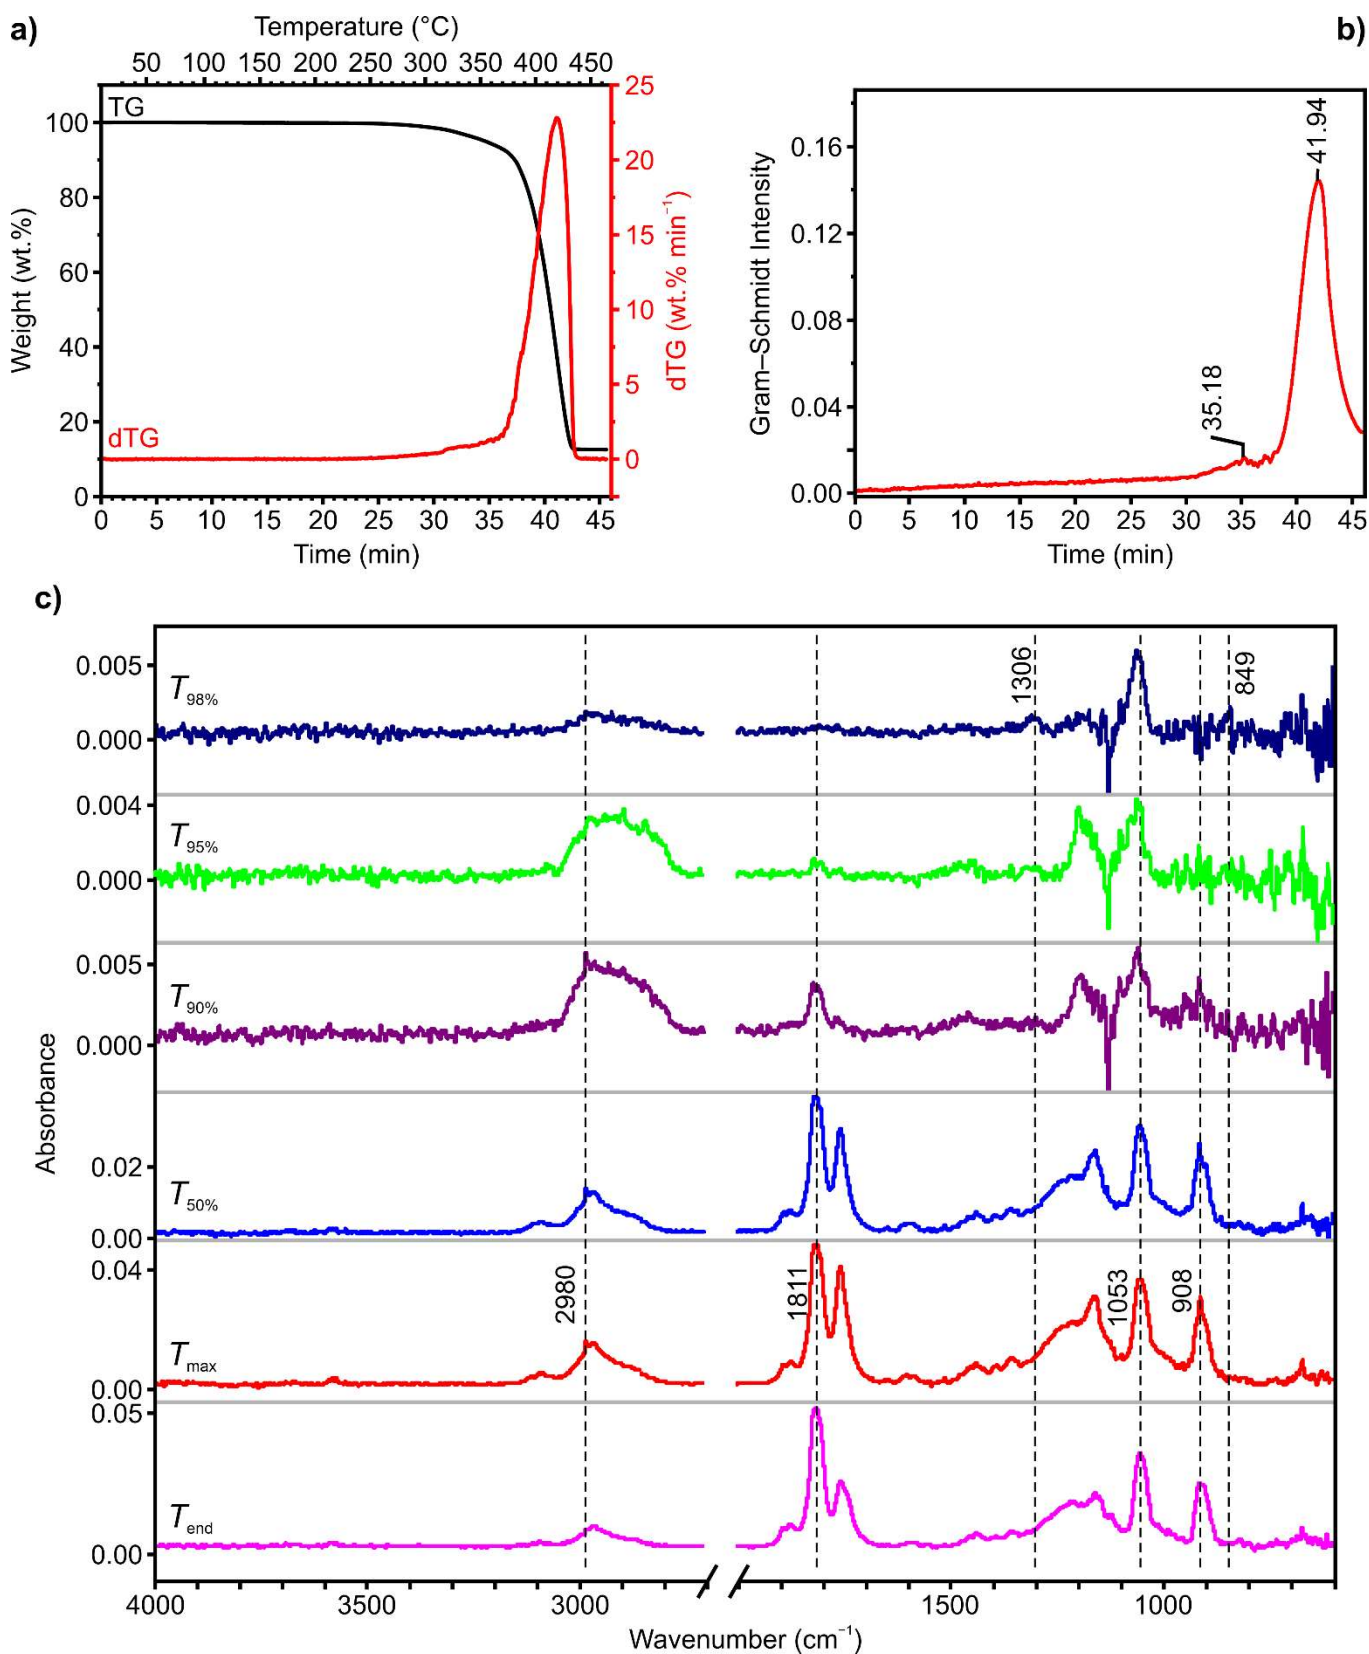

**Fig. S10.** TGA-FTIR analysis of PBS/20%ZnDMP under nitrogen: a) mass loss (TG) and 1<sup>st</sup> derivative mass loss (dTG) curves, b) Gram-Schmidt curve, c) FTIR gas-phase spectra recorded at points associated with PBS/20%ZnDMP characteristic temperatures as described in Table S1

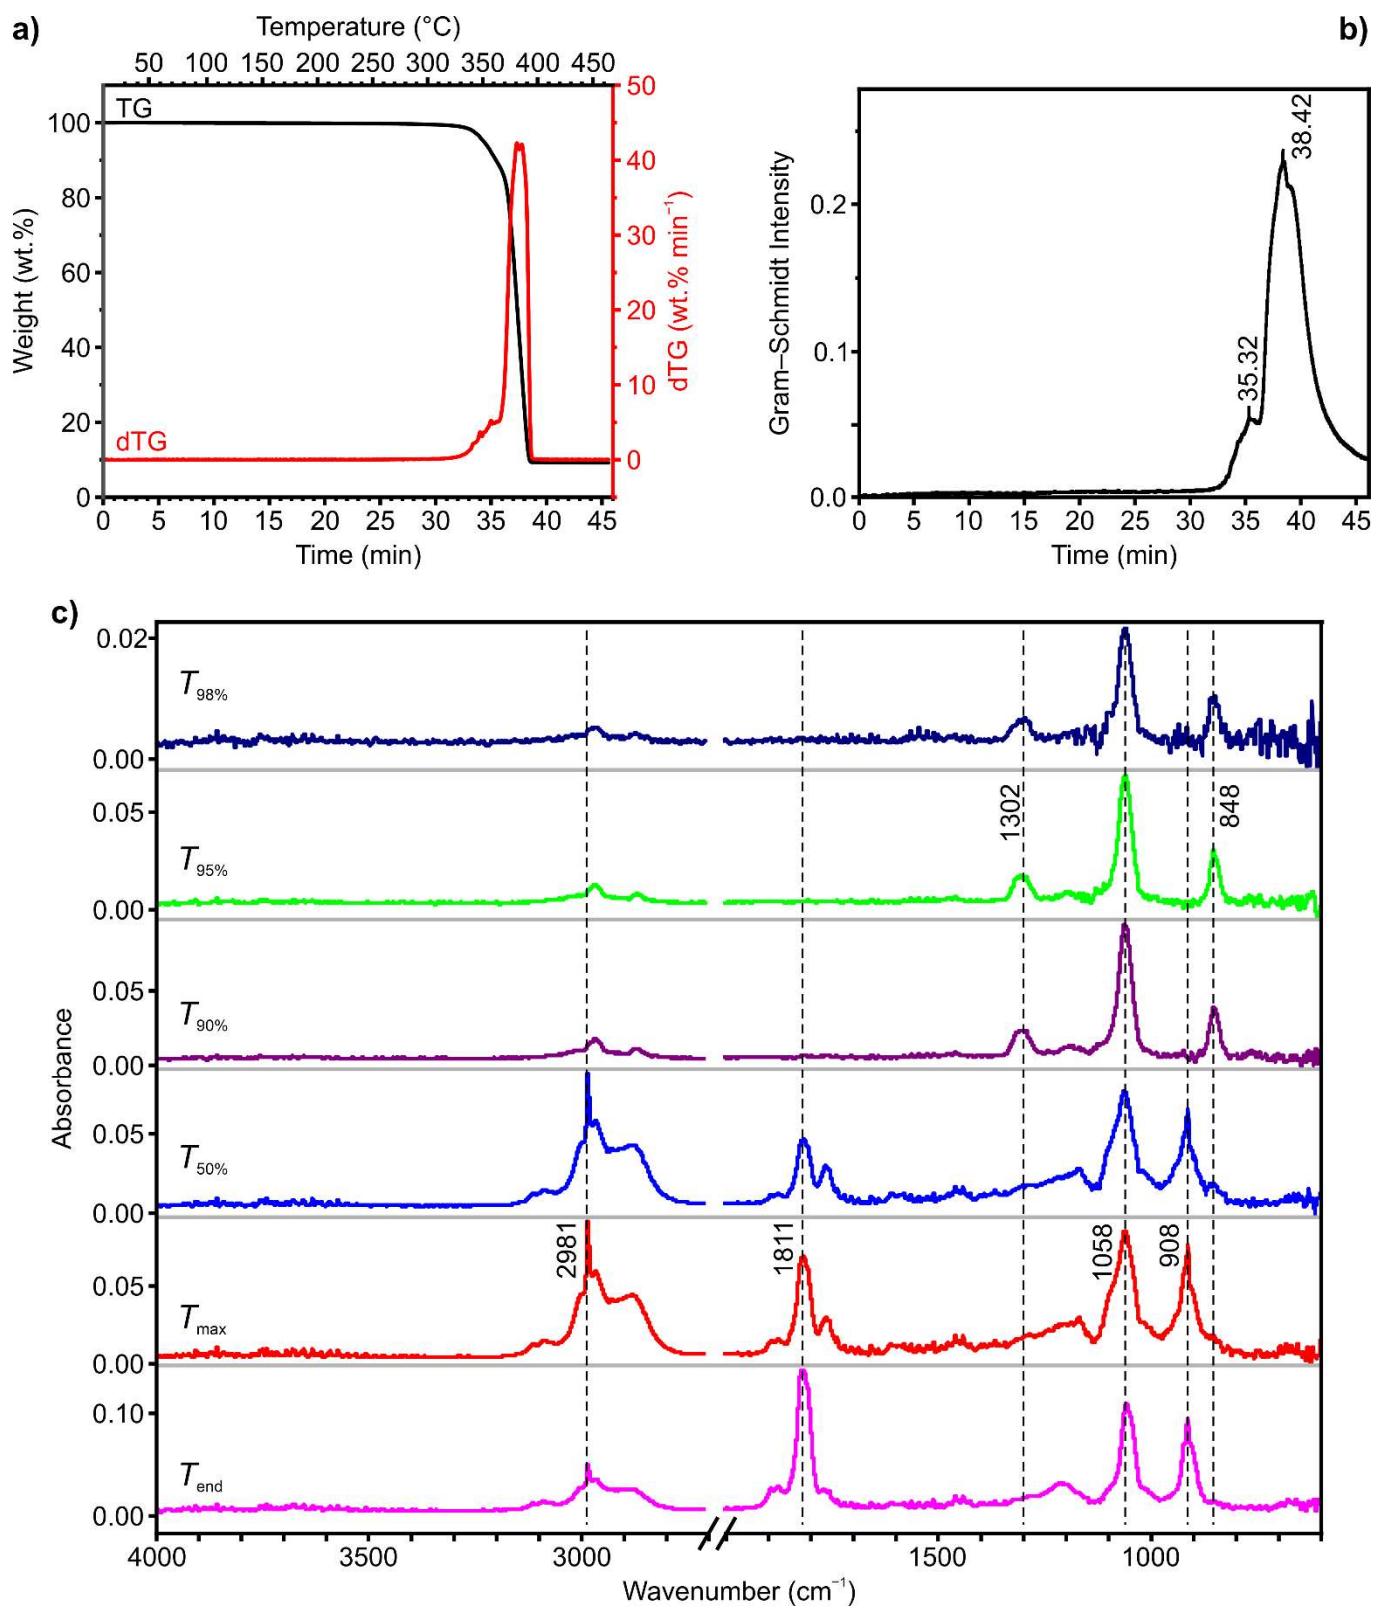

**Fig. S11.** TGA–FTIR analysis of PBS/20%AIDMP under nitrogen: a) mass loss (TG) and 1<sup>st</sup> derivative mass loss (dTG) curves, b) Gram-Schmidt curve, c) FTIR gas-phase spectra recorded at points associated with PBS/20%AIDMP characteristic temperatures as described in Table S1



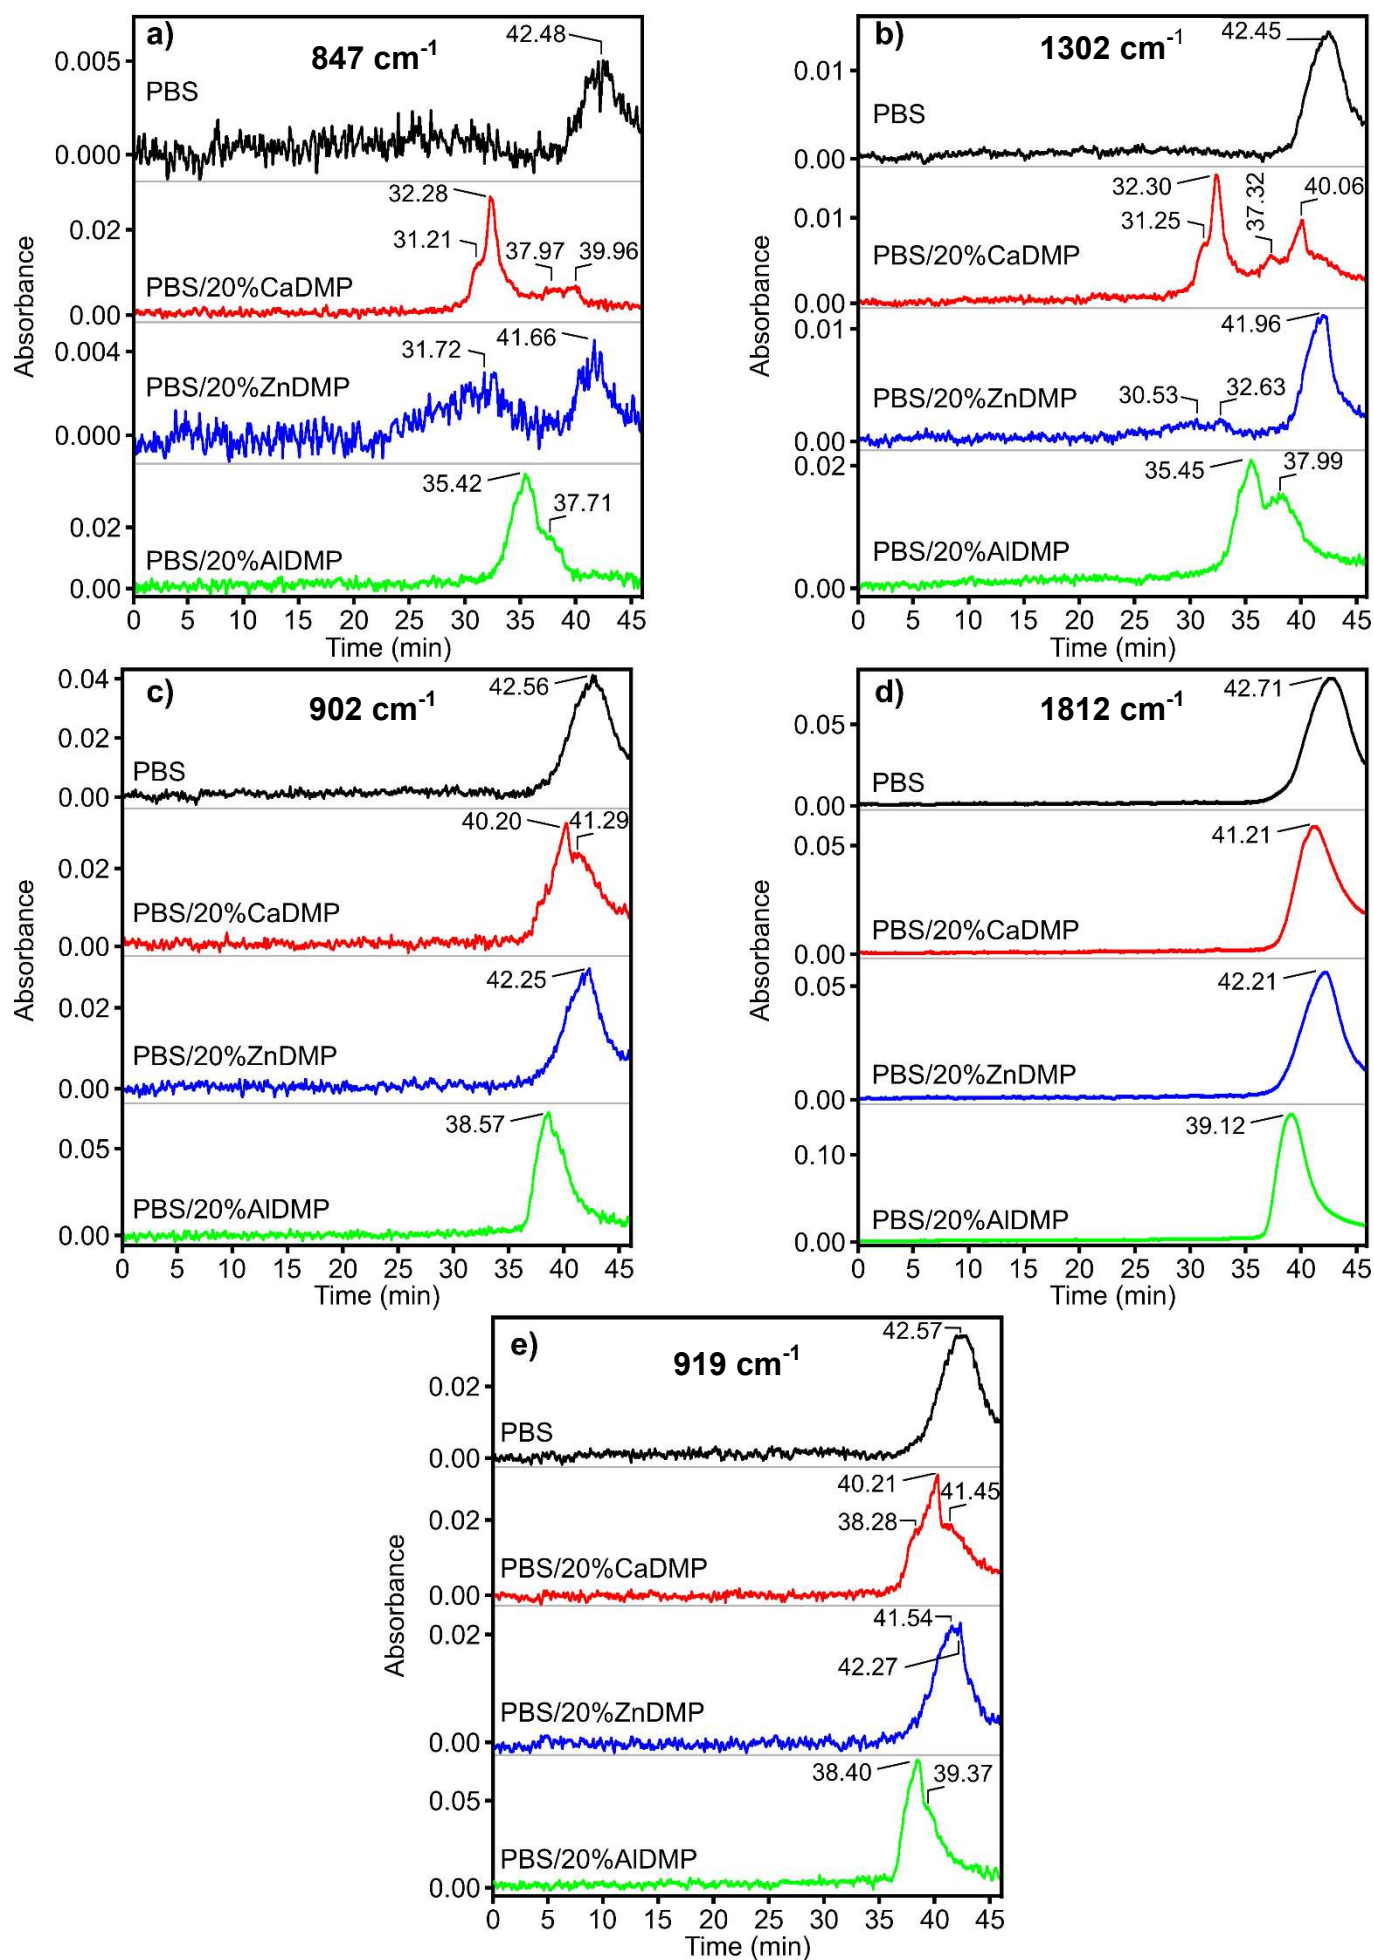

**Fig. S12.** Time profiles of the FT-FTIR diagnostic bands of TMP (a, b), succinic anhydride (c, d) and THF (e) obtained during EGA of PBS (black line) and its composites containing 20 wt.% of CaDMP (red line), ZnDMP (blue line) or AIDMP (green line)

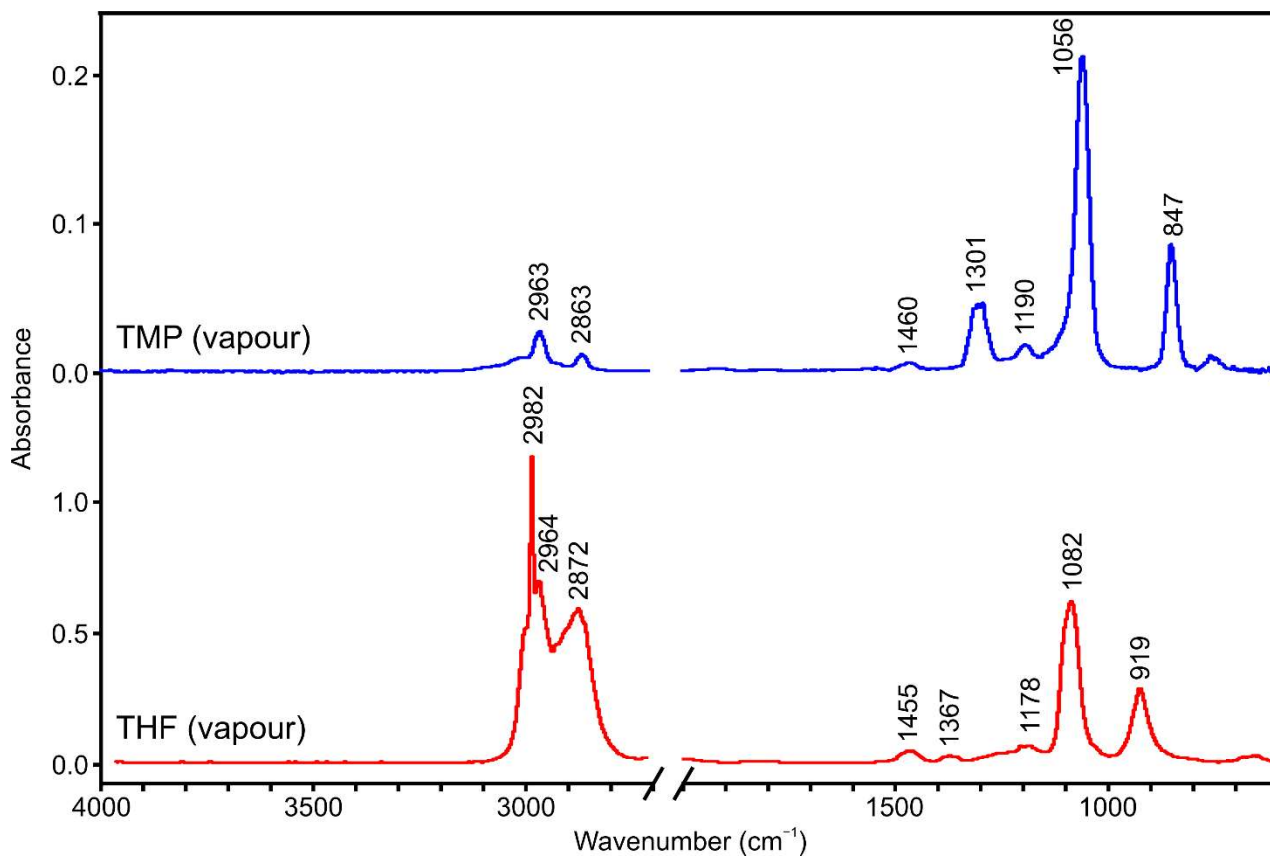

**Fig. S13.** Gas phase FTIR spectra of: a) TMP reference sample heated at 126.80 °C, and b) THF obtained from the NIST spectral database [NIST Standard Reference Database 69: *NIST Chemistry WebBook*.

<https://webbook.nist.gov/cgi/cbook.cgi?ID=C109999&Units=SI&Type=IR-SPEC&Index=0#IR-SPEC>, accessed 15 December]

2025)

$$FI = \left( 1 - \frac{avEHC_{composite}}{avEHC_{polymer}} \right) \times 100\% \quad (S1)$$

$$Ch = \left( \frac{CY_{composite} - CY_{polymer}}{100\% - CY_{polymer}} \right) \times 100\% \quad (S2)$$

$$BaPL = \left( 1 - \frac{pHRR_{composite} \times pHRR_{polymer}^{-1}}{THE_{composite} \times TH_{polymer}^{-1}} \right) \times 100\% \quad (S3)$$

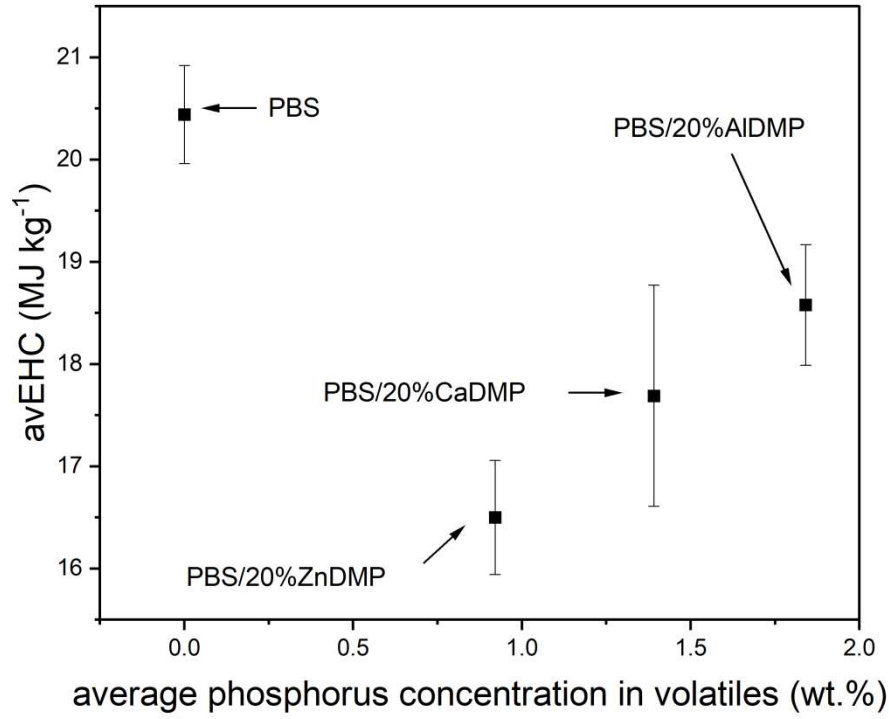

**Fig. S14.** avEHC dependency of the average phosphorus concentration in volatiles

### Derivation of an equation governing the mean phosphorus concentration in volatile compounds

The average phosphorus concentration in the volatiles is given by the Equation 4.

$$c_P = \frac{m_P}{m_V} \times 100\% \quad (\text{S4})$$

$m_P$  can be calculated as a difference between the mass of phosphorus in the sample of the composite before combustion and mass of phosphorus in the char residue.

$$m_P = m_{P(s)} - m_{P(ch)} \quad (\text{S5})$$

$m_{P(s)}$  and  $m_{P(ch)}$  are given by Equations (6) and (7) respectively:

$$m_{P(s)} = m_{Mt(s)} \times f_s \quad (\text{S6})$$

$$m_{P(ch)} = m_{Mt(ch)} \times f_{ch} \quad (\text{S7})$$

Assuming no emissions of volatile compounds of calcium or zinc or aluminum during combustion of PBS/20%MtDOPs:

$$m_{Mt(ch)} = m_{Mt(s)} = 20\% \times c_{Mt} \times m_s \quad (\text{S8})$$

By combining Eq. 5 – 8 we obtain:

$$m_P = 20\% \times c_{Mt} \times m_s \times (f_s - f_{ch}) \quad (\text{S9})$$

$m_V$  is correlated with  $CY$  by following equation:

$$m_V = m_s \times \left(1 - \frac{CY}{100\%}\right) \quad (\text{S10})$$

By combining Eq. 4, 8 and 9, we obtain:

$$c_P = \frac{20\% \times c_{Mt} \times (f_s - f_{Ch})}{100\% - CY} \times 100\% \text{ (S11)}$$

where  $c_P$  - average phosphorus concentration in the volatiles,  $c_{Mt}$  – weight fraction of Ca or Zn or Al in corresponding MtDOP,  $f_s$  – measured by EDS weight P/Mt weight ratio in corresponding MtDOP,  $f_{Ch}$  – measured by EDS weight P/Mt weight ratio in corresponding char residue,  $m_P$  – mass of phosphorus released to the gas phase during combustion of corresponding composite,  $m_{P(s)}$  – mass of the phosphorus in sample of corresponding composite before combustion,  $m_{P(Ch)}$  – mass of the phosphorus in char residue after combustion of corresponding composite,  $m_V$  – total mass of the volatiles released during combustion of the corresponding composite,  $m_s$  – mass of the sample of composite subjected MLC test,  $m_{Mt(s)}$  – mass of Ca or Zn or Al in the sample of corresponding composite before combustion,  $m_{Mt(Ch)}$  – mass of Ca or Zn or Al in char residue after combustion of the corresponding composite,  $CY$  – char yield after combustion of the corresponding composite
